# Supplementary material for: Knowledge and perceptions of obese housewives in Sri Lanka: a qualitative study
Source: Research Square preprint supplement (doi:10.21203/rs.3.rs-7460183/v1), 2025-09-19
Supplement: Supplementary file 1 [file 365d7ee0b53d210e8282976d.docx]

**Interview guide for individual interviews**

Introduction

Good morning/afternoon/evening!

Thank you for accepting our invitation and taking part in this interview. The purpose of this study is to obtain details about obesity from your view point. This interview can be used in improving your knowledge on your health and improve the quality of your life. I will ask you a set of questions to cover different aspects of your personal details related to obesity. You may respond to those questions in a way you feel comfortable. As there are no right or wrong answers for the questions posted to you, you can freely express yourself. It is perfectly ok with you if you do not want to respond to the questions asked from you. We would like to audio record the interview with you. The recording will be kept confidential, identified only by a reference no assigned to you and shared only with the members of our research team.

I will begin the session by asking you a set of questions about your personal information.

Reference No:…………………………………

Age: ……………………………………………………..

Area of residence: ……………………………………………

Marital status: ………………………………………………..

Education:…………………………………………………….

Occupation: ……………………………………………………

Monthly income: ………………………………………………

Are you suffering from any diseases? If yes what are those? ……………………………………

Physical measurements

Height ………………………..cm

Weight ………………………. kg

Waist circumference ……………….cm

Hip circumference ………………… cm

- Theme: Perceptions of housewives on obesity
- Component: General idea about their obesity condition
- Question: What do you know about obesity?

Probes:

- What are the causes/risk factors of obesity?
- What did your doctor/healthcare professional say as the reason for getting obesity?
- Do your other family members have obesity/central obesity?
- How do you feel about your obesity condition?
- Do you know your BMI/waist circumference value?
- What kind of support you get from your family/peers/relatives?
- Do you think that you have risks for getting other diseases because of obesity?
- Do you feel any uncomfortable situations or restrictions you face because of obesity?

Question: As you think what is the importance of diet in managing the obesity?

- What do you think about the relationship of your dietary pattern and obesity?
- Have you changed your normal dietary pattern after becoming obese?
- As you think what kind of changes you have made to your normal diet?

Question: As you think what is the importance of physical activity in managing the obesity?

- Do you think that there is a relationship between obesity and engaging the physical activities?
- As you think what is the role of physical activities in reducing your bodyweight / central obesity?
- In which kind of physical activities, you normally engage with?

Question: As you think what are the barriers you face in managing the obesity condition by diet and physical activity?

Probes

- What are the barriers you face when you try to control your body weight?
- As you think, what are the barriers you face when you try to change your diet?
- As you think, what are the barriers prevent you from engaging in physical activities
- Are there any personal barriers that prevent you from adhering to a healthy lifestyle pattern?
- What are your suggestions to overcome the existing barriers?

Thank you very much for your kind responses!
